# Supplementary material for: Obesity is a risk factor for intrahepatic cholangiocarcinoma progression associated with alterations of metabolic activity and immune status
Source: PubMed Central journal article supplement (PMC7955092; doi:10.1038/s41598-021-85186-6), 2021-03-12
Supplement: 41598_2021_85186_MOESM1_ESM.pdf [file 41598_2021_85186_MOESM1_ESM.pdf]

**Obesity is a risk factor for intrahepatic cholangiocarcinoma progression associated with alterations of metabolic activity and immune status**

**Kyohei Yugawa, MD, PhD<sup>1,#</sup>, Shinji Itoh, MD, PhD<sup>1,#,\*</sup>, Norifumi Iseda, MD<sup>1</sup>, Takeshi Kurihara, MD, PhD<sup>1</sup>, Yoshiyuki Kitamura, MD, PhD<sup>3</sup>, Takeo Toshima, MD, PhD<sup>1</sup>, Noboru Harada, MD, PhD<sup>1</sup>, Kenichi Kohashi, MD, PhD<sup>2</sup>, Shingo Baba, MD, PhD<sup>3</sup>, Kousei Ishigami, MD, PhD<sup>3</sup>, Yoshinao Oda, MD, PhD<sup>2</sup>, Tomoharu Yoshizumi, MD, PhD<sup>1</sup>, and Masaki Mori, MD, PhD<sup>1</sup>**

<sup>1</sup>Department of Surgery and Science, Graduate School of Medical Sciences, Kyushu University, Fukuoka 812-8582, Japan

<sup>2</sup>Department of Anatomic Pathology, Graduate School of Medical Sciences, Kyushu University, Fukuoka 812-8582, Japan

<sup>3</sup>Department of Clinical Radiology, Graduate School of Medical Sciences, Kyushu University, Fukuoka 812-8582, Japan

<sup>#</sup>These authors contributed equally

**\*Corresponding author:** Shinji Itoh, MD, PhD, Department of Surgery and Science, Graduate School of Medical Sciences, Kyushu University, Fukuoka 812-8582, Japan

Tel: +81-92-642-5466

Fax: +81-92-642-5482

E-mail: itoshin@surg2.med.kyushu-u.ac.jp

**Supplementary Figure 1**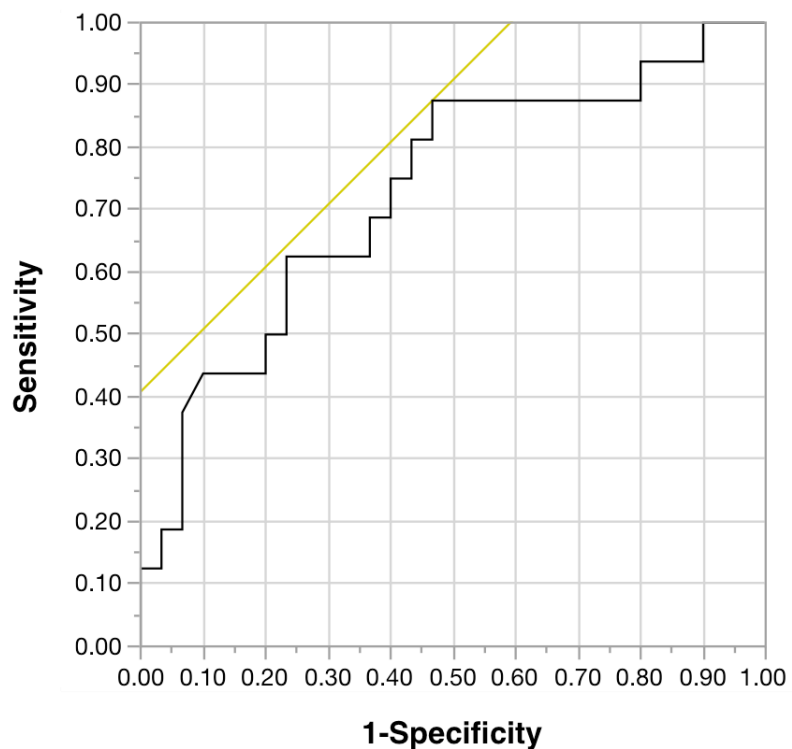

**Supplementary Figure 1. Receiver operating characteristic (ROC) curve analysis for the optimal cutoff of the maximum standardized uptake value for fluorine-18 fluorodeoxyglucose on positron emission tomography/computed tomography.** The area under the ROC curve was 0.728. The sensitivity and specificity were 87.5 and 53.3%, respectively.

## Supplementary Figure 2

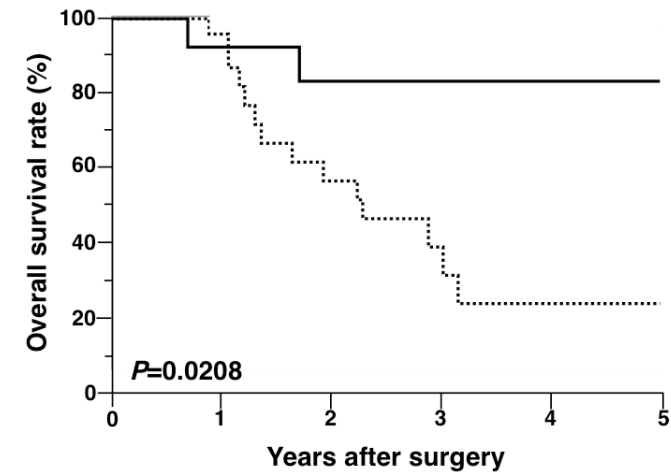

Number at risk

| Years             | 0  | 1  | 2  | 3 | 4 | 5 |
|-------------------|----|----|----|---|---|---|
| — SUVmax<6.79     | 18 | 13 | 8  | 5 | 5 | 4 |
| ..... SUVmax≥6.79 | 28 | 24 | 12 | 6 | 4 | 2 |

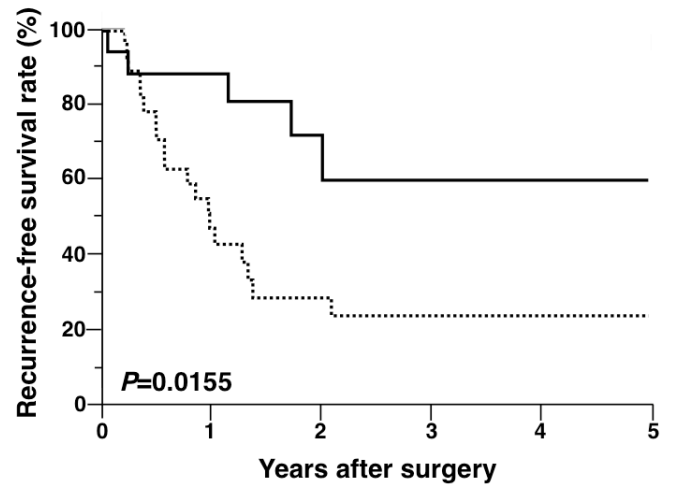

Number at risk

| Years             | 0  | 1  | 2 | 3 | 4 | 5 |
|-------------------|----|----|---|---|---|---|
| — SUVmax<6.79     | 18 | 13 | 7 | 5 | 5 | 3 |
| ..... SUVmax≥6.79 | 28 | 13 | 7 | 5 | 5 | 2 |

**Supplementary Figure 2. Overall and recurrence-free survival rates after hepatic resection for intrahepatic cholangiocarcinoma in patients with high and low maximum standardized uptake values (SUVmax).**

### Supplementary Figure 3

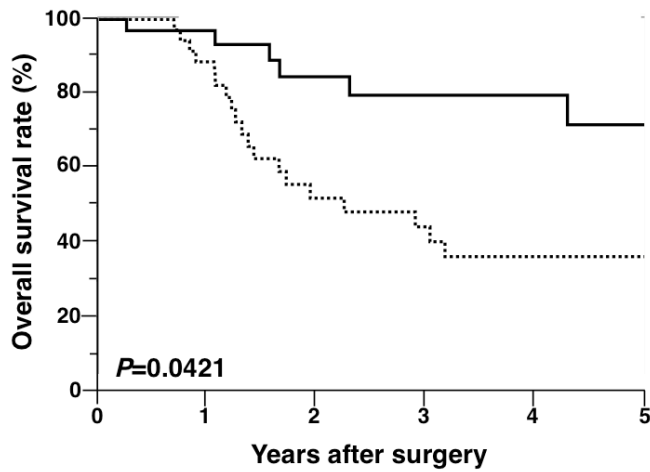

Number at risk

| Years                | 0  | 1  | 2  | 3  | 4  | 5 |
|----------------------|----|----|----|----|----|---|
| — PD-L1 negative     | 33 | 27 | 19 | 13 | 11 | 9 |
| ..... PD-L1 positive | 41 | 32 | 15 | 12 | 10 | 7 |

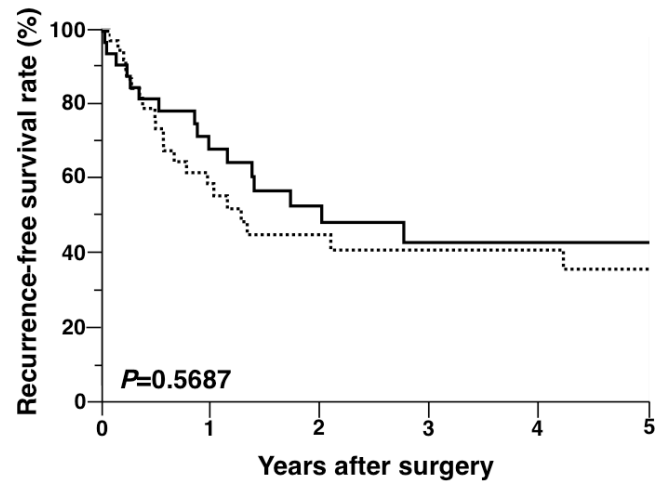

Number at risk

| Years                | 0  | 1  | 2  | 3  | 4  | 5 |
|----------------------|----|----|----|----|----|---|
| — PD-L1 negative     | 33 | 21 | 13 | 9  | 8  | 6 |
| ..... PD-L1 positive | 41 | 21 | 12 | 10 | 10 | 7 |

**Supplementary Figure 3. Overall and recurrence-free survival rates after hepatic resection for intrahepatic cholangiocarcinoma in patients with programmed death-ligand 1 (PD-L1) + and PD-L1- tumors.**
